# Supplementary material
Source: Springer Nature journal article supplement (https://www.springermedizin.de/resource/supplementary/13075_2010_9714_MOESM5_ESM.pdf/9693360)

(a)

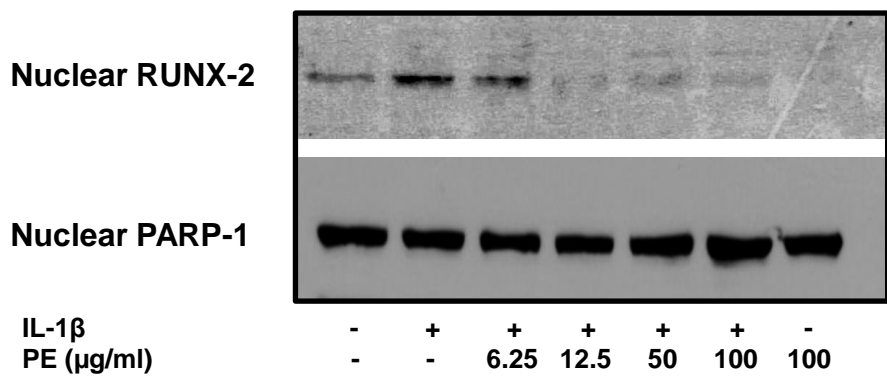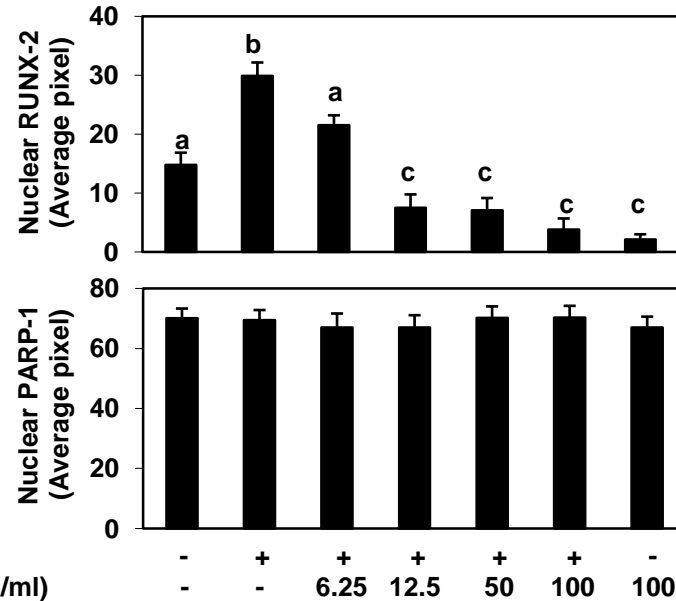

(b)

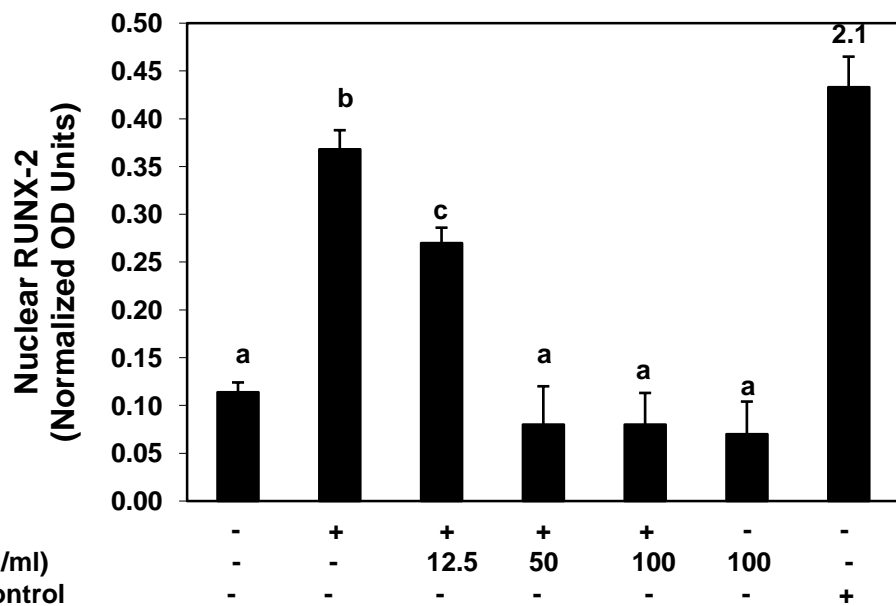

(c)

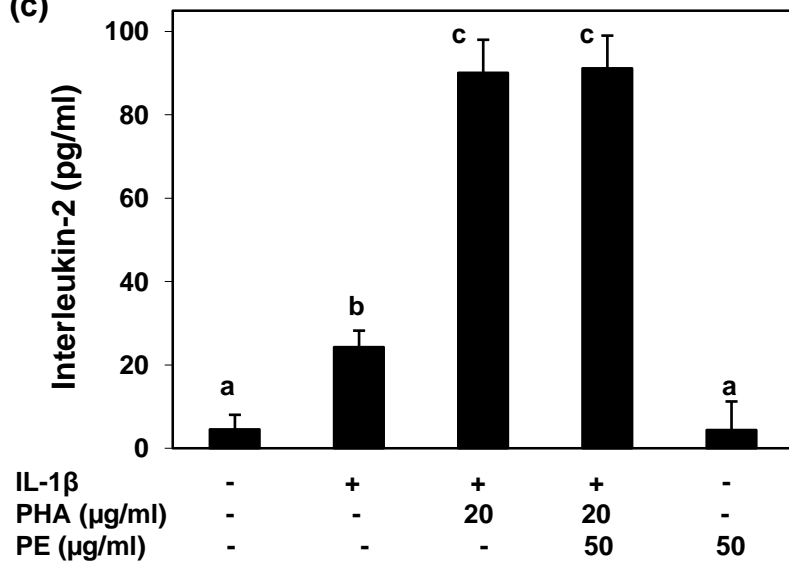

Supplement: MOESM5 [file 9693360]
